## TGF $\beta$ activates PI3K-AKT signaling via TRAF6

Jie Song and Maréne Landström

Deregulation of the PI3K/AKT pathway has been reported in many types of cancer, including prostate cancer. As AKT regulates survival, metabolism, migration and therapy resistance in cancer cells, aberrant, high activity of AKT is involved in poor prognosis in cancer patients [1]. Transforming growth factor- $\beta$  (TGF $\beta$ ) family members are important for regulation of embryogenesis and tissue homeostasis, and high levels of TGF $\beta$  is correlated to cancer progression due to its potent regulatory effects on cells trans-differentiation, proliferation, migration and invasion of cancer cells [2]. Some of these effects are believed to occur due to that TGF $\beta$  promotes non-canonical Smad-signaling pathways, leading to activation of the PI3K - AKT pathway, although the precise molecular mechanisms behind this event have not been revealed [2].

Ubiquitination, a dynamic post-translational modification, is one of the key mechanisms to regulate cellular processes via a single ubiquitin or ubiquitin chains covalently attached to an acceptor lysine of the target protein. Lys48-linked polyubiquitination usually mediates proteasomal degradation of target proteins, whereas Lys63-linked polyubiquitination performs various non-degradative regulatory roles, including endocytosis, DNA damage tolerance and signal transduction [3]. It has been reported that upon IGF-1 stimulation, AKT is ubiquitinated by E3 ligase TRAF6, leading to the membrane localization and phosphorylation of AKT [4]. Our recent data shows that TGF $\beta$  stimulation, *via* TRAF6, caused the Lys63-linked polyubiquitination of p85 $\alpha$ , which leads to activation of the PI3K pathway followed by membrane recruitment of AKT and thereby its activation (Figure 1) [5].

We demonstrated that AKT interacts with TRAF6 upon TGF $\beta$  stimulation. TGF $\beta$  induces polyubiquitination of AKT in a TRAF6 dependent manner and the polyubiquitination is correlated with the activation of AKT. The phosphorylation of AKT by TGF $\beta$  is not affected by T $\beta$ RI kinase but in contrast, is dependent on PI3K activity. Moreover, p85 $\alpha$  interacts with T $\beta$ RI *via* its SH2 domains in a TRAF6-dependent manner. Upon TGF $\beta$  stimulation, TRAF6, T $\beta$ RI, phosphorylated AKT and p85 $\alpha$  colocalize in cell membrane ruffles formed in migratory cells. TRAF6 induces polyubiquitination of p85 $\alpha$  upon TGF $\beta$  stimulation, which is independent of T $\beta$ RI and T $\beta$ RRII kinase activity. We could also identify Lys<sup>513</sup> and/or Lys<sup>519</sup> in the iSH2 domain as the acceptor of polyubiquitination in p85 by mass spectrometry analysis. Polyubiquitination of

p85 $\alpha$  possibly results in a conformational change, thereby releasing the inhibitory contacts of SH2 domains of p85 $\alpha$  from p110. Interestingly, by measuring the concentration of PIP<sub>3</sub>, we found that TRAF6 and p85 $\alpha$  are important for the TGF $\beta$ -induced activation of PI3K [5].

We further demonstrated that the PI3K/AKT pathway and TRAF6 are important in TGF $\beta$ -induced cell migration. The treatment of the inhibitor of PI3K: wortmannin and LY294002 significantly decreases the migration of prostate cancer cells. The prostate cancer cells expressing double mutant K513R/K519R show reduced migration compared to wild-type Flag-p85 $\alpha$  transfected cells, indicating that polyubiquitination of p85 $\alpha$  is involved in the cell migration. Finally and importantly, by *in situ* proximity ligation, we found that Lys63-linked polyubiquitination of p85 $\alpha$  is correlated with higher Gleason score, which indicates the aggressiveness and poor prognosis of prostate cancer, suggesting that

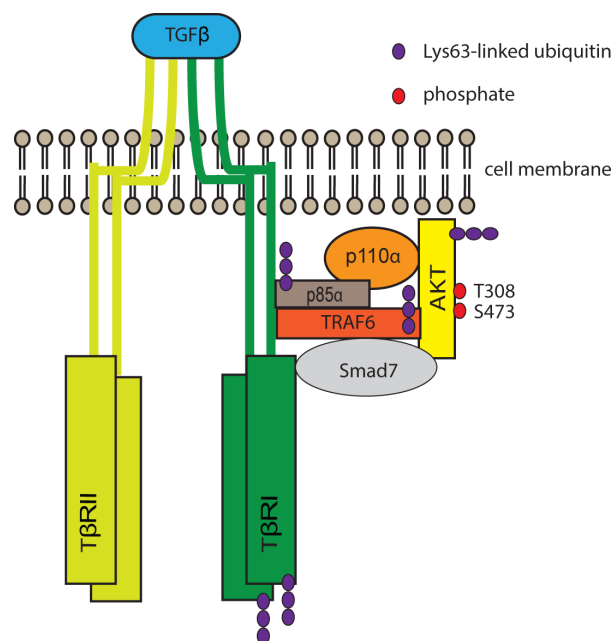

**Figure 1: Proposed model for TGF $\beta$ -induced polyubiquitination of p85 $\alpha$  and AKT, activation of PI3K and AKT.** TGF $\beta$  ligands induce oligomerization of TGF $\beta$  receptors. TRAF6, which constitutively interacts with T $\beta$ RI [6], undergoes autoubiquitination and ubiquitinates thereafter T $\beta$ RI [7]. Then TRAF6 causes Lys63-linked polyubiquitination of p85 $\alpha$ , leading to the activation of PI3K, production of PIP<sub>3</sub>, and phosphorylation of AKT. Smad7, which is shown to have an adaptor function, is required for the recruitment of p85 and AKT [2, 5].

active AKT pathway is implicated in tumor progression [5].

It will be important in future research to investigate further the mechanistic link between PI3K and TGF $\beta$ , as both of them are upregulated and promotes aggressiveness in prostate cancer. TGF $\beta$  signaling pathways include Smad-dependent and non-canonical Smad-independent signaling pathways. The non-Smad signaling pathways include Erk, JNK, the p38 MAPK pathway and PI3K pathway [2]. Our recent findings revealed the detail mechanism of the activation of PI3K/AKT caused by TGF $\beta$ . Moreover, upon TGF $\beta$  stimulation, the E3 ubiquitin ligase TRAF6, induces Lys63-linked polyubiquitination and activation of TGF $\beta$ -activated kinase-1 (TAK1), leading to the activation the JNK and p38 pathways [6]. Furthermore, TGF $\beta$ , via TRAF6, causes Lys63-linked polyubiquitination of T $\beta$ RI, promoting the cleavage of T $\beta$ RI by TNF $\alpha$ -converting enzyme (TACE). Then the intracellular domain of T $\beta$ RI (T $\beta$ RI-ICD) translocates to the nucleus, targeting the downstream genes which are involved in tumor invasion [7]. APPL1, which is also ubiquitinated by TRAF6, is crucial for the nuclear translocation of T $\beta$ RI-ICD, also in a manner regulated by the PI3K pathway [8]. In summary, TRAF6 plays an important role to orchestrate several Smad-independent TGF $\beta$  signaling pathways and to promote oncogenic signals in cancer cells. To visualize activation of this pathway in prostate cancer tissues is therefore important to develop in future molecular pathology, with the hope to identify patients with aggressive prostate cancer in an early phase.

Maréne Landström: Medical Biosciences Department, Umeå University, Umeå, Sweden

**Correspondence to:** Maréne Landström, **email** Marene.Landstrom@medbio.umu.se

**Keywords:** AKT; PI3K; p85; TGF $\beta$ ; TRAF6

**Received:** October 04, 2017

**Published:** November 02, 2017

## REFERENCES

1. Fruman DA, et al. Cell. 2017; 170:605-35.
2. Mu Y, et al. Cell Tissue Res. 2012; 347:11-20.
3. Chen ZJ, et al. Mol Cell. 2009; 33:275-86.
4. Yang W, et al. Science. 2009; 325:1134-8.
5. Hamidi A, et al. Sci Signal. 2017; 10:eaal4186.
6. Sorrentino A, et al. Nat Cell Biol. 2008; 10:1199-207.
7. Mu Y, et al. Nat Commun. 2011; 2:330.
8. Song J, et al. Oncotarget. 2016; 7:279-92.  
<https://doi.org/10.18632/oncotarget.6346>

Copyright: Song et al. This is an open-access article distributed under the terms of the Creative Commons Attribution License 3.0 (CC BY 3.0), which permits unrestricted use, distribution, and reproduction in any medium, provided the original author and source are credited.
